# Supplementary material
Source: PubMed Central journal article supplement (PMC4327867)

# Supplementary Figure 2

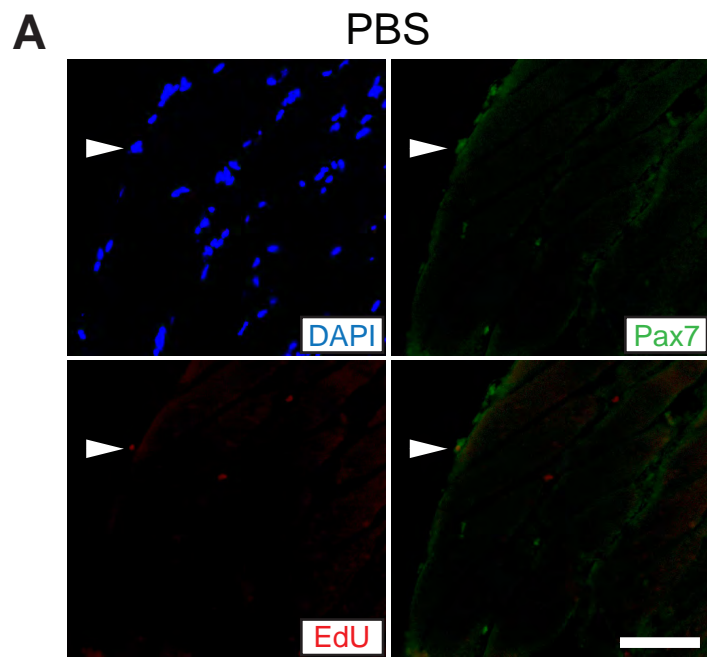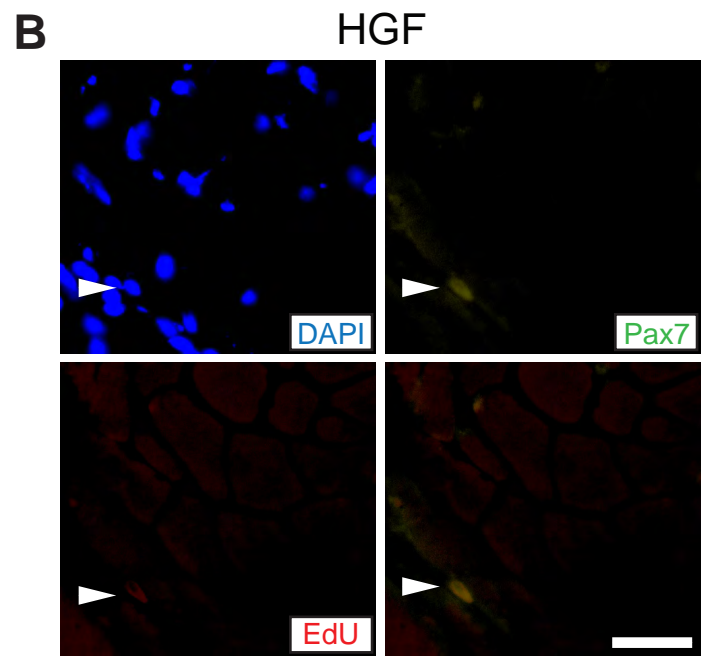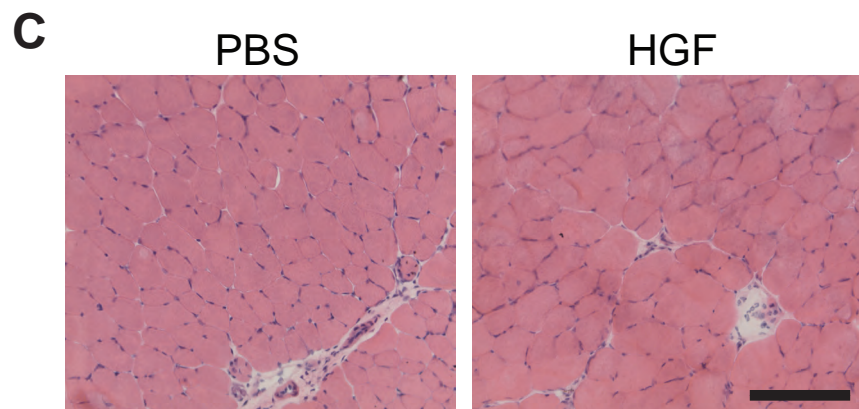

Supplement: NIHMS648268-supplement-2.pdf [file NIHMS648268-supplement-2.pdf]

# Supplementary Figure 3

**A**

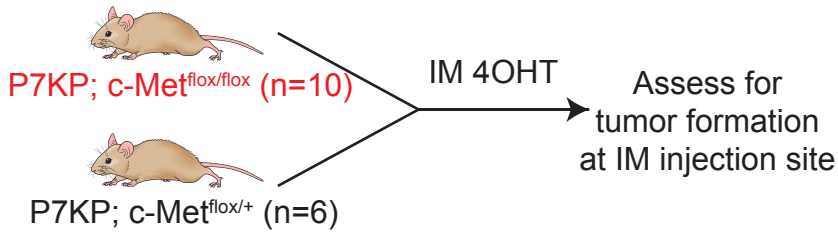

**B**

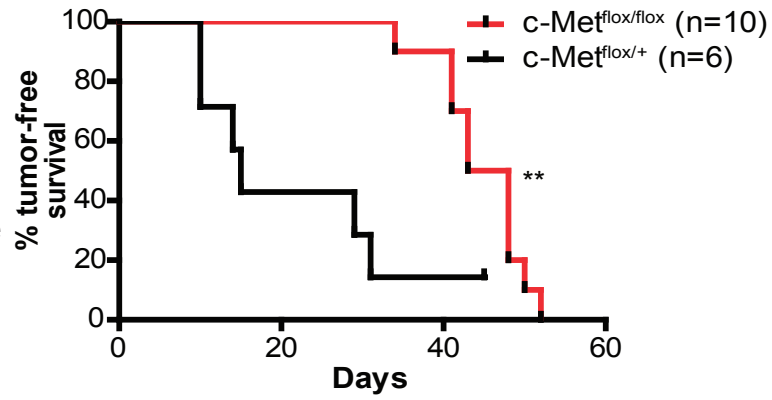

**C**

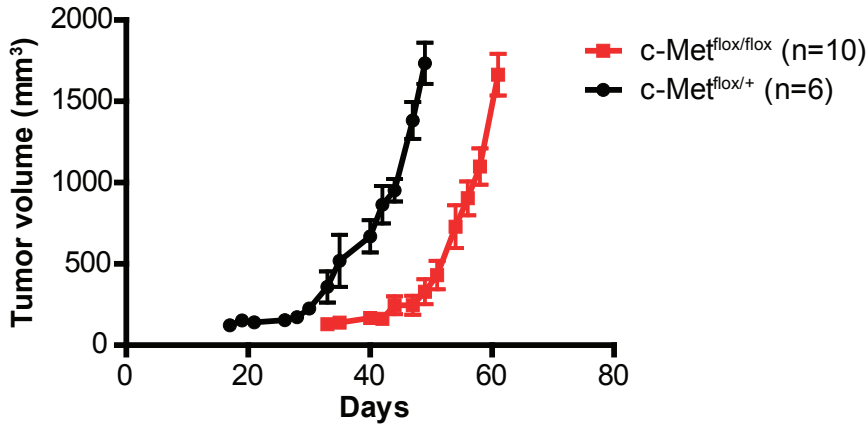

Supplement: NIHMS648268-supplement-3.pdf [file NIHMS648268-supplement-3.pdf]
